# Supplementary material
Source: ML conference proceedings conference paper supplement (https://openreview.net/forum?id=6eqyiE3Uu1)
Supplement: supplementary_material [file Supplementary.pdf › Supplementary Materials/Supplementary.pdf]

000  
001  
002  
003  
004  
005  
006  
007  
008  
009  
010  
011  
012  
013  
014  
015  
016  
017  
018  
019  
020  
021  
022  
023  
024  
025  
026  
027  
028  
029  
030  
031  
032  
033  
034  
035  
036  
037  
038  
039  
040  
041  
042  
043  
044  
045  
046  
047  
048  
049  
050  
051  
052  
053

---

# 1 SUPPLEMENTARY MATERIALS

**Anonymous GitHub Page and Demo Link** To facilitate the review process, we have created an anonymous github page. The project page can be accessed at the following URL:

<https://anonymous.4open.science/r/Scene-R1-D537>

**Our Codes** The supplementary .zip file that you have downloaded contains this PDF (Supplementary.pdf) and a directory named `code/`. The `code/` directory includes our core model implementation, evaluation scripts, and a `README.pdf` with detailed setup and execution instructions, as mentioned in our main paper’s reproducibility statement.
